# Supplementary material
Source: PubMed Central journal article supplement (PMC6547116)
Supplement: jamaoncol-5-975-s001.pdf [file jamaoncol-5-975-s001.pdf]

## Supplementary Online Content

Dess RT, Hartman HE, Mahal BA, et al. Association of black race with prostate cancer–specific and other-cause mortality. *JAMA Oncol*. Published online May 23, 2019. doi:10.1001/jamaoncol.2019.0826

**eTable 1.** Randomized Clinical Trial Details

**eTable 2.** Exclusions and Missing Variables in the SEER, VA, and RCT Data Sets

**eTable 3.** Description of Baseline Characteristics by Race (All Variables)

**eTable 4.** Description of Baseline Characteristics by Race After Inverse Probability Weighting (All Variables)

**eTable 5.** Inverse Probability Weighted 5- and 10-y estimates of Prostate Cancer–Specific Mortality, Other-Cause Mortality, and All-Cause Mortality

**eTable 6.** Summary of Prostate Cancer–Specific Mortality, Other-Cause Mortality, and All-Cause Mortality Models

**eFigure 1.** Absolute Standard Percentage Differences in the Variables by Race Within the Weighted and Unweighted Data Sets for SEER (A), VA (B), and RCT (C)

**eFigure 2.** Subgroup Forest Plots of Hazard of Prostate Cancer Specific Mortality for SEER Cohort (A), SEER Cohort With Fine-Gray Competing Risks (B), VA Cohort (C), VA Cohort With Fine-Gray Competing Risks (D), RCT Cohort (E), and RCT Cohort With Fine-Gray Competing Risks (F)

**eFigure 3.** Cumulative Incidence of Prostate Cancer–Specific Mortality and Other-Cause Mortality for the Unadjusted and Unweighted SEER (A), VA (B), and RCT (C) Cohorts

**eFigure 4.** Cumulative Incidence of All-Cause Mortality for the Inverse Probability Weighted SEER (A), VA (B), and RCT (C) Cohorts

**eFigure 5.** Cumulative Incidence of All-Cause Mortality for the Unadjusted SEER (A), VA (B), and RCT (C) Cohorts

This supplementary material has been provided by the authors to give readers additional information about their work.

**eTable 1.** Randomized Clinical Trial Details

| Trial     | Years     | Criteria                                                                                                                                                                                                           | Treatment                                                                                                                                                                                                                          |
|-----------|-----------|--------------------------------------------------------------------------------------------------------------------------------------------------------------------------------------------------------------------|------------------------------------------------------------------------------------------------------------------------------------------------------------------------------------------------------------------------------------|
| RCT 92-02 | 1992-1995 | Clinical stage T2c to T4 with no involved nodes in the common iliac or higher node chains, pretreatment prostate-specific antigen (PSA) < 150 ng/mL                                                                | Neoadjuvant (2 months) and concurrent androgen deprivation therapy (ADT) with radiation<br><br>Randomized to receive no further treatment (STAD-RT) or to receive ADT for additional 2 years after the completion of RT (LTAD-RT). |
| RCT 94-08 | 1994-2001 | Clinical stage T1b-T2b (AJCC 6 <sup>th</sup> Edition) and a PSA ≤ 20 ng/mL                                                                                                                                         | Randomized to receive either radiotherapy plus short-term ADT (4 months) or radiotherapy alone                                                                                                                                     |
| RCT 94-13 | 1995-1999 | Clinically localized disease with high risk of lymph node involvement, or T2c-T4 tumors and Gleason ≥6, PSA < 100 ng/mL                                                                                            | Randomized to whole-pelvic vs. prostate-only radiation<br><br>and also<br>Randomized to combined neoadjuvant (2 months) + concurrent (2 months) ADT vs. adjuvant ADT (4 months)                                                    |
| RCT 99-10 | 2000-2004 | T1b-4 (AJCC, 5 <sup>th</sup> edition) AND<br>- Gleason 2-6, AND PSA >10 but ≤ 100 ng/mL<br>- Gleason 7 AND PSA < 20 ng/mL<br>or<br>T1b-1c (AJCC, 5 <sup>th</sup> edition) AND<br>- Gleason 8-10 AND PSA < 20 ng/mL | Randomized to either neoadjuvant (2 months) and concurrent ADT with radiation or prolonged neoadjuvant (7 months) followed by concurrent ADT with radiation                                                                        |

**eTable 2.** Exclusions and Missing Variables in the SEER, VA, and RCT Data Sets

| Data set | Variable       | Black   |                    |                 | White   |                    |                 | Overall |                    |                 |
|----------|----------------|---------|--------------------|-----------------|---------|--------------------|-----------------|---------|--------------------|-----------------|
|          |                | Missing | Cumulative Missing | Total Remaining | Missing | Cumulative Missing | Total Remaining | Missing | Cumulative Missing | Total Remaining |
| SEER     |                |         |                    | 61012           |         |                    | 283424          |         |                    | 344436          |
|          | Survival time  | 289     | 289                | 60723           | 916     | 916                | 282508          | 1205    | 1205               | 343231          |
|          | Gleason        | 1623    | 1888               | 59124           | 7336    | 8140               | 275284          | 8959    | 10028              | 334408          |
|          | T-stage        | 523     | 2155               | 58857           | 2065    | 9229               | 274195          | 2588    | 11384              | 333052          |
|          | Yost Index     | 7       | 2160               | 58852           | 86      | 9285               | 274139          | 93      | 11445              | 332991          |
|          | PSA            | 7086    | 8172               | 52840           | 35474   | 39991              | 243433          | 42560   | 48163              | 296273          |
| VA       |                |         |                    | 1615            |         |                    | 3029            |         |                    | 4644            |
|          | T-stage        | 64      | 64                 | 1551            | 311     | 311                | 2718            | 375     | 375                | 4269            |
|          | Gleason        | 50      | 102                | 1513            | 310     | 559                | 2470            | 360     | 661                | 3983            |
|          | Age            | 9       | 102                | 1513            | 0       | 559                | 2470            | 0       | 661                | 3983            |
|          | PSA            | 4       | 102                | 1513            | 49      | 568                | 2461            | 53      | 670                | 3974            |
|          | PSA >150 ng/mL | 0       | 102                | 1513            | 1       | 569                | 2460            | 1       | 671                | 3973            |
| RCT      |                |         |                    | 1160            |         |                    | 4851            |         |                    | 6011            |
|          | T-stage        | 0       | 0                  | 1160            | 0       | 0                  | 4851            | 0       | 0                  | 6011            |
|          | Gleason        | 28      | 28                 | 1132            | 116     | 116                | 4735            | 144     | 144                | 5867            |
|          | n-stage        | 1       | 29                 | 1131            | 1       | 117                | 4734            | 2       | 146                | 5865            |
|          | Zubrod         | 0       | 29                 | 1131            | 0       | 117                | 4734            | 0       | 146                | 5865            |
|          | PSA            | 2       | 31                 | 1129            | 9       | 126                | 4725            | 11      | 157                | 5854            |
|          | Age            | 0       | 31                 | 1129            | 0       | 126                | 4725            | 0       | 157                | 5854            |

**eTable 3.** Description of Baseline Characteristics by Race (All Variables)

| Variable n (%)                 | SEER Cohort    |                 | VA Cohort      |                 | RCT Cohort       |                  |
|--------------------------------|----------------|-----------------|----------------|-----------------|------------------|------------------|
|                                | White          | Black           | White          | Black           | White            | Black            |
| N                              | 243433 (82)    | 52840 (18)      | 2459 (62)      | 1513 (38)       | 4725 (81)        | 1129 (19)        |
| Follow up time<br>Median (IQR) | 76 (49, 105)   | 70 (45, 100)    | 98 (61, 145)   | 94 (55, 142)    | 105 (71, 132)    | 101 (60, 131)    |
| Age<br>Median (IQR)            | 65 (59, 71)    | 62 (56, 69)     | 64 (60, 68)    | 61 (56, 65)     | 71 (66, 74)      | 69 (64, 73)      |
| Gleason Score                  |                |                 |                |                 |                  |                  |
| <=6                            | 115709 (48)    | 23304 (44)      | 1214 (49)      | 724 (48)        | 1926 (41)        | 494 (44)         |
| 7                              | 95810 (39)     | 22515 (43)      | 896 (36)       | 600 (40)        | 1978 (42)        | 424 (38)         |
| 8                              | 18440 (8)      | 4498 (9)        | 248 (10)       | 142 (9)         | 512 (11)         | 140 (12)         |
| 9-10                           | 13474 (6)      | 2523 (5)        | 101 (4)        | 47 (3)          | 309 (7)          | 71 (6)           |
| T-Stage                        |                |                 |                |                 |                  |                  |
| T1/T2a                         | 109467 (45)    | 28634 (54)      | 2040 (83)      | 1339 (89)       | 2306 (49)        | 619 (55)         |
| T2b/c                          | 108214 (45)    | 19878 (38)      | 398 (16)       | 171 (11)        | 1393 (30)        | 307 (27)         |
| T3/T4                          | 25752 (11)     | 4328 (8)        | 21 (1.0)       | 3 (0.2)         | 1026 (22)        | 203 (18)         |
| N-Stage                        |                |                 |                |                 |                  |                  |
| N0                             | 237646 (98)    | 51727 (98)      | 2459 (100)     | 1513 (100)      | 2802 (59)        | 657 (58)         |
| N1/N2                          | 5787 (2)       | 1113 (2)        | 0              | 0               | 59               | 12               |
| NX                             | 0              | 0               | 0              | 0               | (1)<br>1864 (39) | (1)<br>460 (41)  |
| PSA ng/mL                      |                |                 |                |                 |                  |                  |
| Median (IQR)                   | 6.0 (4.5, 8.9) | 6.6 (4.8, 10.8) | 6.2 (4.6, 9.2) | 7.0 (4.9, 10.7) | 11.5 (7.2, 17.7) | 13.7 (7.9, 22.2) |
| <10                            | 194149 (80)    | 38086 (72)      | 2166 (75)      | 1417 (76)       | 1991 (42)        | 404 (36)         |
| ≥10 - <20                      | 34055 (14)     | 9278 (18)       | 536 (19)       | 329 (18)        | 1599 (34)        | 347 (31)         |
| ≥20                            | 15229 (6)      | 5476 (10)       | 198 (7)        | 115 (6)         | 1135 (24)        | 378 (34)         |
| Risk Group                     |                |                 |                |                 |                  |                  |
| Low                            | 54305 (22)     | 11574 (22)      | 868 (35)       | 474 (31)        | 524 (11)         | 130 (12)         |
| Intermediate                   | 130387 (54)    | 27693 (52)      | 1134 (46)      | 750 (50)        | 2115 (45)        | 444 (39)         |
| High                           | 52954 (22)     | 12460 (24)      | 457 (19)       | 289 (19)        | 2027 (43)        | 543 (48)         |
| Node Positive                  | 5787 (2)       | 1113 (2)        |                |                 | 59 (1)           | 12 (1)           |
| Zubrod                         |                |                 |                |                 |                  |                  |
| 0                              |                |                 |                |                 | 4391 (93)        | 975 (86)         |

|                  |                      |                     |            |            |            |            |
|------------------|----------------------|---------------------|------------|------------|------------|------------|
| 1                |                      |                     |            |            | 334 (7)    | 154 (14)   |
| Yost variable*   | 11302 (10722, 11600) | 10971 (9898, 11432) |            |            |            |            |
| Median (IQR)     |                      |                     |            |            |            |            |
| Q1 n (%)         | 43308 (18)           | 15564 (29)          |            |            |            |            |
| Q2 n (%)         | 45757 (19)           | 12359 (23)          |            |            |            |            |
| Q3 n (%)         | 48505 (20)           | 10920 (21)          |            |            |            |            |
| Q4 n (%)         | 51633 (21)           | 8234 (16)           |            |            |            |            |
| Q5 n (%)         | 54230 (22)           | 5763 (11)           |            |            |            |            |
| Insurance        |                      |                     |            |            |            |            |
| Insured          | 157220 (65)          | 32704 (62)          |            |            |            |            |
| Medicaid         | 3632 (1)             | 2745 (5)            |            |            |            |            |
| Uninsured        | 1656 (1)             | 1138 (2)            |            |            |            |            |
| Unknown          | 80925 (33)           | 16253 (31)          |            |            |            |            |
| RT               | 96166 (40)           | 23802 (45)          | 0 (0)      | 0 (0)      | 4725 (100) | 1129 (100) |
| Surgery          | 101104 (42)          | 17379 (33)          | 2459 (100) | 1513 (100) | 0 (0)      | 0 (0)      |
| No Surgery or RT | 52092 (21)           | 12737 (24)          |            |            |            |            |
| Treatment arm**  |                      |                     |            |            |            |            |
| 1                |                      |                     |            |            | 606 (13)   | 95 (8)     |
| 2                |                      |                     |            |            | 587 (12)   | 90 (8)     |
| 3                |                      |                     |            |            | 731 (15)   | 193 (17)   |
| 4                |                      |                     |            |            | 740 (16)   | 186 (16)   |
| 5                |                      |                     |            |            | 214 (5)    | 88 (8)     |
| 6                |                      |                     |            |            | 217 (5)    | 86 (8)     |
| 7                |                      |                     |            |            | 222 (5)    | 77 (7)     |
| 8                |                      |                     |            |            | 228 (5)    | 71 (6)     |
| 9                |                      |                     |            |            | 591 (13)   | 116 (10)   |
| 10               |                      |                     |            |            | 589 (12)   | 127 (11)   |

\*Q1 = [8177, 10302), Q2 = [10302, 11045), Q3 = [11045, 11395), Q4 = [11395, 11619), Q5 = [11618, 11829]

\*\*[1] "9202: Long-term Androgen Deprivation + RT"  
 [2] "9202: Short-term Androgen Deprivation + RT"  
 [3] "9408: Hormone + RT"  
 [4] "9408: RT Alone"  
 [5] "9413: PO RT + AHT"  
 [6] "9413: PO RT + NHT"

[7] "9413: WP RT + AHT"

[8] "9413: WP RT + NHT"

[9] "9910: 28-week TAS RT+TAS"

[10] "9910: 8-week TAS RT+TAS"

**eTable 4.** Description of Baseline Characteristics by Race After Inverse Probability Weighting (All Variables)

| Variable n (%)                 | SEER Cohort |            | VA Cohort  |            | RCT Cohort |            |
|--------------------------------|-------------|------------|------------|------------|------------|------------|
|                                | White       | Black      | White      | Black      | White      | Black      |
| N                              | 243433 (82) | 52840 (18) | 2459 (62)  | 1513 (38)  | 4725 (81)  | 1129 (19)  |
| Follow up time<br>Median (IQR) | 75          | 72         | 100        | 94         | 105        | 102        |
| Age<br>Mean (sd)               | 64.8 (8.9)  | 64.9 (8.9) | 61.9 (6.0) | 62.0 (6.2) | 69.7 (6.5) | 69.9 (6.5) |
| Gleason Score                  |             |            |            |            |            |            |
| <=6                            | 114236 (47) | 25141 (48) | 1203 (49)  | 751 (50)   | 1948 (41)  | 454 (40)   |
| 7                              | 97155 (40)  | 20795 (39) | 923 (38)   | 562 (37)   | 1945 (41)  | 482 (43)   |
| 8                              | 18861 (8)   | 4046 (8)   | 241 (10)   | 142 (9)    | 527 (11)   | 129 (11)   |
| 9-10                           | 13181 (5)   | 2858 (5)   | 92 (4)     | 58 (4)     | 305 (6)    | 64 (6)     |
| T-Stage                        |             |            |            |            |            |            |
| T1/T2a                         | 113459 (47) | 24665 (47) | 2088 (85)  | 1282 (85)  | 2358 (50)  | 552 (49)   |
| T2b/c                          | 105243 (43) | 22844 (43) | 356 (14)   | 226 (15)   | 1374 (29)  | 344 (30)   |
| T3/T4                          | 24731 (10)  | 5331 (10)  | 15 (1)     | 5 (0)      | 993 (21)   | 233 (21)   |
| N-Stage                        |             |            |            |            |            |            |
| N0                             | 237646 (98) | 51727 (98) | 2459 (100) | 1513 (100) | 2789 (59)  | 664 (59)   |
| N1/N2                          | 5705 (2)    | 1327 (3)   | 0          | 0          | 58 (1)     | 17 (2)     |
| NX                             | 0           | 0          | 0          | 0          | 1878 (40)  | 447 (40)   |
| PSA ng/mL                      |             |            |            |            |            |            |
| Median                         | 6           | 6.4        | 6.4        | 6.6        | 11.7       | 12.4       |
| Mean                           | 9.0         | 9.2        | 8.9        | 8.9        | 18.6       | 18.9       |
| <10                            | 191622 (79) | 40213 (76) | 1880 (76)  | 1142 (75)  | 1941 (41)  | 451 (40)   |
| ≥10 - <20                      | 34513 (14)  | 8792 (17)  | 420 (17)   | 278 (18)   | 1570 (33)  | 377 (33)   |
| ≥20                            | 17298 (7)   | 3836 (7)   | 159 (6)    | 93 (6)     | 1214 (26)  | 301 (27)   |
| Risk Group                     |             |            |            |            |            |            |
| Low                            | 54113 (22)  | 11935 (23) | 831 (34)   | 513 (34)   | 526 (11)   | 123 (11)   |
| Intermediate                   | 129711 (53) | 28022 (53) | 1164 (47)  | 722 (48)   | 2066 (44)  | 502 (44)   |

|                                                                                             |                                                                                         |                                                                                        |               |               |                                                                                                                  |                                                                                                              |
|---------------------------------------------------------------------------------------------|-----------------------------------------------------------------------------------------|----------------------------------------------------------------------------------------|---------------|---------------|------------------------------------------------------------------------------------------------------------------|--------------------------------------------------------------------------------------------------------------|
| High Node positive                                                                          | 53904 (22)<br>5705 (2)                                                                  | 11557 (22)<br>1327 (3)                                                                 | 464 (19)<br>0 | 278 (18)<br>0 | 2074 (44)<br>58 (1)                                                                                              | 487 (43)<br>17 (2)                                                                                           |
| Zubrod<br>0<br>1                                                                            |                                                                                         |                                                                                        |               |               | 4332 (92)<br>393 (8)                                                                                             | 1037 (92)<br>92 (8)                                                                                          |
| Yost variable<br>Mean<br>Median<br>Q1 n (%)<br>Q2 n (%)<br>Q3 n (%)<br>Q4 n (%)<br>Q5 n (%) | 10929.14<br>11229<br>49540 (20)<br>45886 (19)<br>47122 (19)<br>49517 (20)<br>51368 (21) | 10900.64<br>11065<br>10237 (19)<br>12344 (23)<br>12305 (23)<br>10234 (19)<br>7721 (15) |               |               |                                                                                                                  |                                                                                                              |
| Insurance<br>Insured<br>Medicaid<br>Uninsured<br>Unknown                                    | 155861 (64)<br>5341 (2)<br>2321 (1)<br>79911 (33)                                       | 33671 (64)<br>1153 (2)<br>501 (1)<br>17515 (33)                                        |               |               |                                                                                                                  |                                                                                                              |
| RT                                                                                          | 98617 (41)                                                                              | 21307 (40)                                                                             | 0 (0)         | 0 (0)         | 4725 (100)                                                                                                       | 1129 (100)                                                                                                   |
| Surgery                                                                                     | 97288 (40)                                                                              | 21092 (40)                                                                             | 2459 (100)    | 1513 (100)    | 0 (0)                                                                                                            | 0 (0)                                                                                                        |
| No RT or Surgery                                                                            | 53192 (22)                                                                              | 11752 (22)                                                                             |               |               |                                                                                                                  |                                                                                                              |
| Treatment arm**<br>1<br>2<br>3<br>4<br>5<br>6<br>7<br>8<br>9<br>10                          |                                                                                         |                                                                                        |               |               | 565 (12)<br>546 (12)<br>744 (16)<br>746 (16)<br>247 (5)<br>246 (5)<br>242 (5)<br>240 (5)<br>571 (12)<br>578 (12) | 140 (12)<br>132 (12)<br>175 (15)<br>175 (16)<br>61 (5)<br>58 (5)<br>58 (5)<br>54 (5)<br>136 (12)<br>140 (12) |

\*\*[1] "9202: Long-term Androgen Deprivation + RT"

[2] "9202: Short-term Androgen Deprivation + RT"

[3] "9408: Hormone + RT"

[4] "9408: RT Alone"

[5] "9413: PO RT + AHT"

[6] "9413: PO RT + NHT"

- [7] "9413: WP RT + AHT"
- [8] "9413: WP RT + NHT"
- [9] "9910: 28-week TAS RT+TAS"
- [10] "9910: 8-week TAS RT+TAS"

**eTable 5.** Inverse Probability Weighted 5- and 10-y estimates of Prostate Cancer–Specific Mortality, Other-Cause Mortality, and All-Cause Mortality

|         | SEER                 |                      |                      | VA                   |                      |                        | RCT                  |                      |                         |
|---------|----------------------|----------------------|----------------------|----------------------|----------------------|------------------------|----------------------|----------------------|-------------------------|
|         | White                | Black                | Difference           | White                | Black                | Difference             | White                | Black                | Difference              |
| 5 year  |                      |                      |                      |                      |                      |                        |                      |                      |                         |
| PCSM    | 0.019 (0.018, 0.020) | 0.021 (0.019, 0.022) | 0.002 (0, 0.003)     | 0.01 (0.006, 0.014)  | 0.005 (0.001, 0.009) | -0.005 (-0.011, 0.001) | 0.036 (0.03, 0.041)  | 0.027 (0.016, 0.037) | -0.009 (-0.021, 0.003)  |
| OCM     | 0.058 (0.057, 0.059) | 0.077 (0.074, 0.080) | 0.019 (0.016, 0.022) | 0.211 (0.191, 0.23)  | 0.092 (0.075, 0.109) | 0.021 (0.001, 0.041)   | 0.136 (0.126, 0.146) | 0.174 (0.147, 0.199) | 0.038 (0.01, 0.066)     |
| ACM     | 0.077 (0.076, 0.078) | 0.098 (0.095, 0.101) | 0.021 (0.018, 0.024) | 0.081 (0.07, 0.092)  | 0.097 (0.082, 0.113) | 0.016 (-0.003, 0.035)  | 0.167 (0.156, 0.178) | 0.198 (0.174, 0.221) | 0.031 (0.005, 0.057)    |
| 10 year |                      |                      |                      |                      |                      |                        |                      |                      |                         |
| PCSM    | 0.047 (0.046, 0.048) | 0.052 (0.049, 0.056) | 0.005 (0.001, 0.009) | 0.023 (0.016, 0.03)  | 0.017 (0.008, 0.026) | -0.006 (-0.018, 0.005) | 0.099 (0.09, 0.108)  | 0.077 (0.058, 0.095) | -0.022 (-0.043, -0.001) |
| OCM     | 0.153 (0.151, 0.156) | 0.192 (0.185, 0.198) | 0.038 (0.032, 0.045) | 0.211 (0.191, 0.23)  | 0.21 (0.182, 0.238)  | -0.001 (-0.035, 0.034) | 0.327 (0.313, 0.342) | 0.357 (0.321, 0.391) | 0.029 (-0.009, 0.067)   |
| ACM     | 0.200 (0.198, 0.203) | 0.244 (0.238, 0.250) | 0.044 (0.037, 0.05)  | 0.234 (0.214, 0.254) | 0.227 (0.201, 0.252) | -0.007 (-0.039, 0.026) | 0.426 (0.411, 0.441) | 0.434 (0.401, 0.465) | 0.007 (-0.028, 0.042)   |

PCSM = prostate cancer-specific mortality

OCM = other-cause mortality

ACM = all-cause mortality

ACM: Kaplan-Meier survival estimates

PCSM/OCM: Andersen-Johansen estimates



**eTable 6.** Summary of Prostate Cancer–Specific Mortality, Other-Cause Mortality, and All-Cause Mortality Models

|                       |                      | SEER                     |                  | VA                 |         | RCT                      |              |
|-----------------------|----------------------|--------------------------|------------------|--------------------|---------|--------------------------|--------------|
|                       |                      | HR (95% CI)              | p-value          | HR (95% CI)        | p-value | HR (95% CI)              | p-value      |
| PCSM (cause-specific) | Age-Weighted         | <b>1.35 (1.28, 1.42)</b> | <b>&lt;0.001</b> | 0.89 (0.58, 1.36)  | 0.59    | 0.97 (0.80, 1.17)        | 0.73         |
|                       | Age + Stage-Weighted | <b>1.21 (1.15, 1.28)</b> | <b>&lt;0.001</b> | See Fully-weighted |         | 0.96 (0.79, 1.17)        | 0.68         |
|                       | Fully-weighted       | <b>1.12 (1.06, 1.18)</b> | <b>&lt;0.001</b> | 0.86 (0.57, 1.32)  | 0.50    | 0.86 (0.70, 1.05)        | 0.14         |
| PCSM (Fine and Gray)  | Age-Weighted         | <b>1.30 (1.23, 1.37)</b> | <b>&lt;0.001</b> | 0.88 (0.57, 1.34)  | 0.55    | 0.90 (0.74, 1.09)        | 0.27         |
|                       | Age + Stage-Weighted | <b>1.17 (1.11, 1.24)</b> | <b>&lt;0.001</b> | See Fully-weighted |         | 0.89 (0.73, 1.08)        | 0.24         |
|                       | Fully-Weighted       | <b>1.09 (1.04, 1.15)</b> | <b>&lt;0.001</b> | 0.85 (0.56, 1.30)  | 0.46    | <b>0.81 (0.66, 0.99)</b> | <b>0.036</b> |
| OCM (cause-specific)  | Age-Weighted         | <b>1.55 (1.51, 1.59)</b> | <b>&lt;0.001</b> | 1.09 (0.95, 1.24)  | 0.21    | <b>1.16 (1.05, 1.28)</b> | <b>0.005</b> |
|                       | Age + Stage-Weighted | <b>1.48 (1.44, 1.52)</b> |                  | See Fully-weighted |         | <b>1.18 (1.06, 1.30)</b> | <b>0.002</b> |
|                       | Fully-weighted       | <b>1.31 (1.27, 1.34)</b> | <b>&lt;0.001</b> | 1.07 (0.93, 1.23)  | 0.29    | <b>1.16 (1.05, 1.28)</b> | <b>0.003</b> |
| OCM (Fine and Gray)   | Age-Weighted         | <b>1.54 (1.49, 1.58)</b> | <b>&lt;0.001</b> | 1.09 (0.96, 1.24)  | 0.19    | <b>1.15 (1.04, 1.27)</b> | <b>0.008</b> |
|                       | Age + Stage-Weighted | <b>1.47 (1.43, 1.51)</b> | <b>&lt;0.001</b> | See Fully-weighted |         | <b>1.16 (1.05, 1.28)</b> | <b>0.003</b> |
|                       | Fully-Weighted       | <b>1.30 (1.27, 1.34)</b> | <b>&lt;0.001</b> | 1.08 (0.95, 1.23)  | 0.26    | <b>1.17 (1.06, 1.29)</b> | <b>0.002</b> |
| ACM                   | Age-Weighted         | <b>1.50 (1.47, 1.54)</b> | <b>&lt;0.001</b> | 1.07 (0.94, 1.21)  | 0.30    | <b>1.11 (1.02, 1.22)</b> | <b>0.019</b> |
|                       | Age + Stage-Weighted | <b>1.43 (1.38, 1.45)</b> | <b>&lt;0.001</b> | See Fully-weighted |         | <b>1.13 (1.03, 1.23)</b> | <b>0.009</b> |
|                       | Fully-Weighted       | <b>1.26 (1.23, 1.29)</b> | <b>&lt;0.001</b> | 1.05 (0.93, 1.19)  | 0.42    | 1.09 (1.00, 1.19)        | 0.057        |

PCSM = prostate cancer-specific mortality

OCM = other-cause mortality

ACM = all-cause mortality



**eFigure 1.** Absolute Standard Percentage Differences in the Variables by Race Within the Weighted and Unweighted Data Sets for SEER (A), VA (B), and RCT (C) Cohorts

**Figure 1a**

# SEER Race Differences

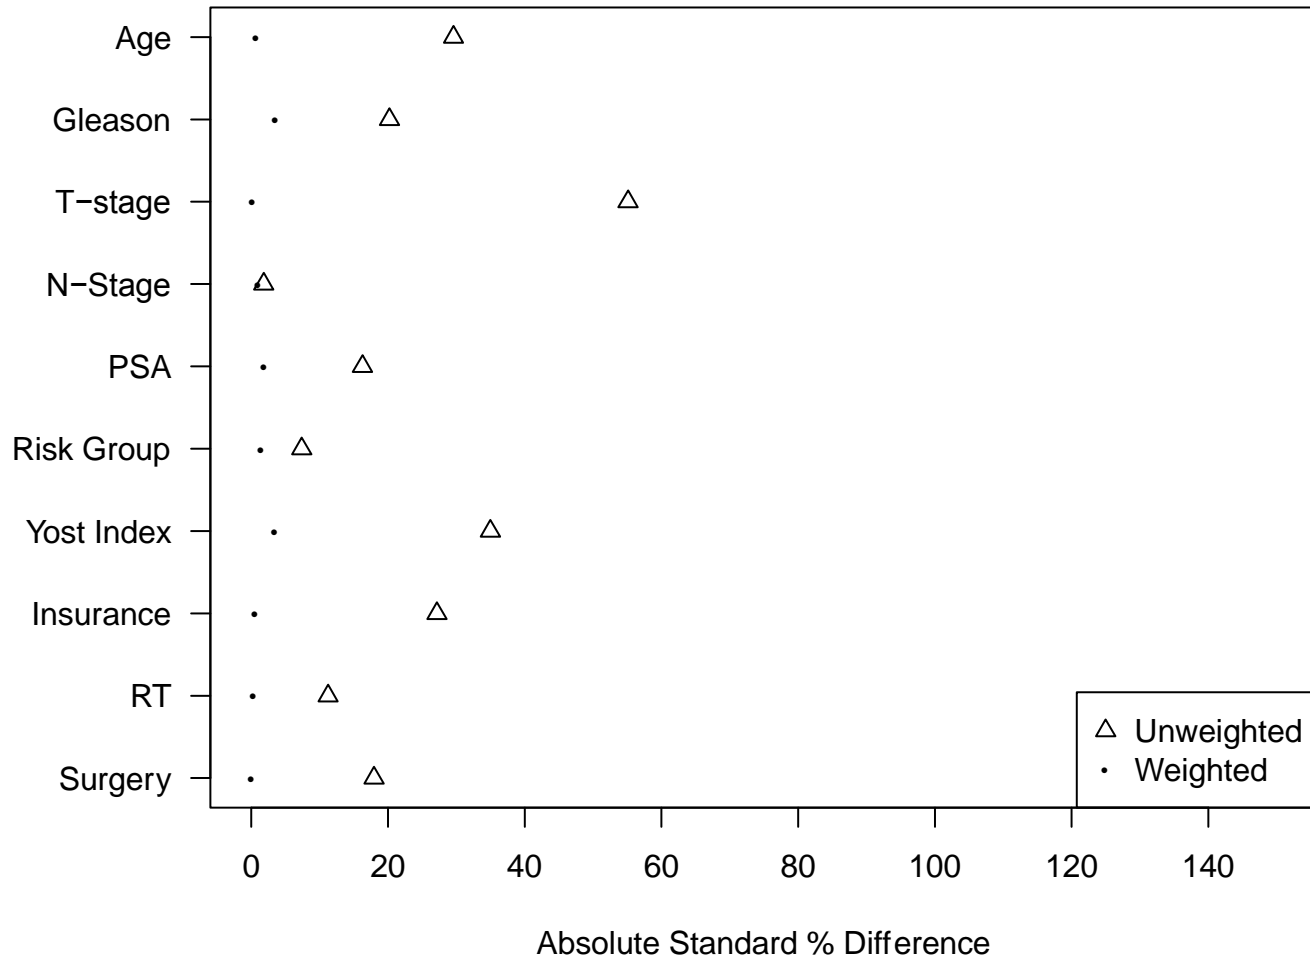

### VA Race Differences

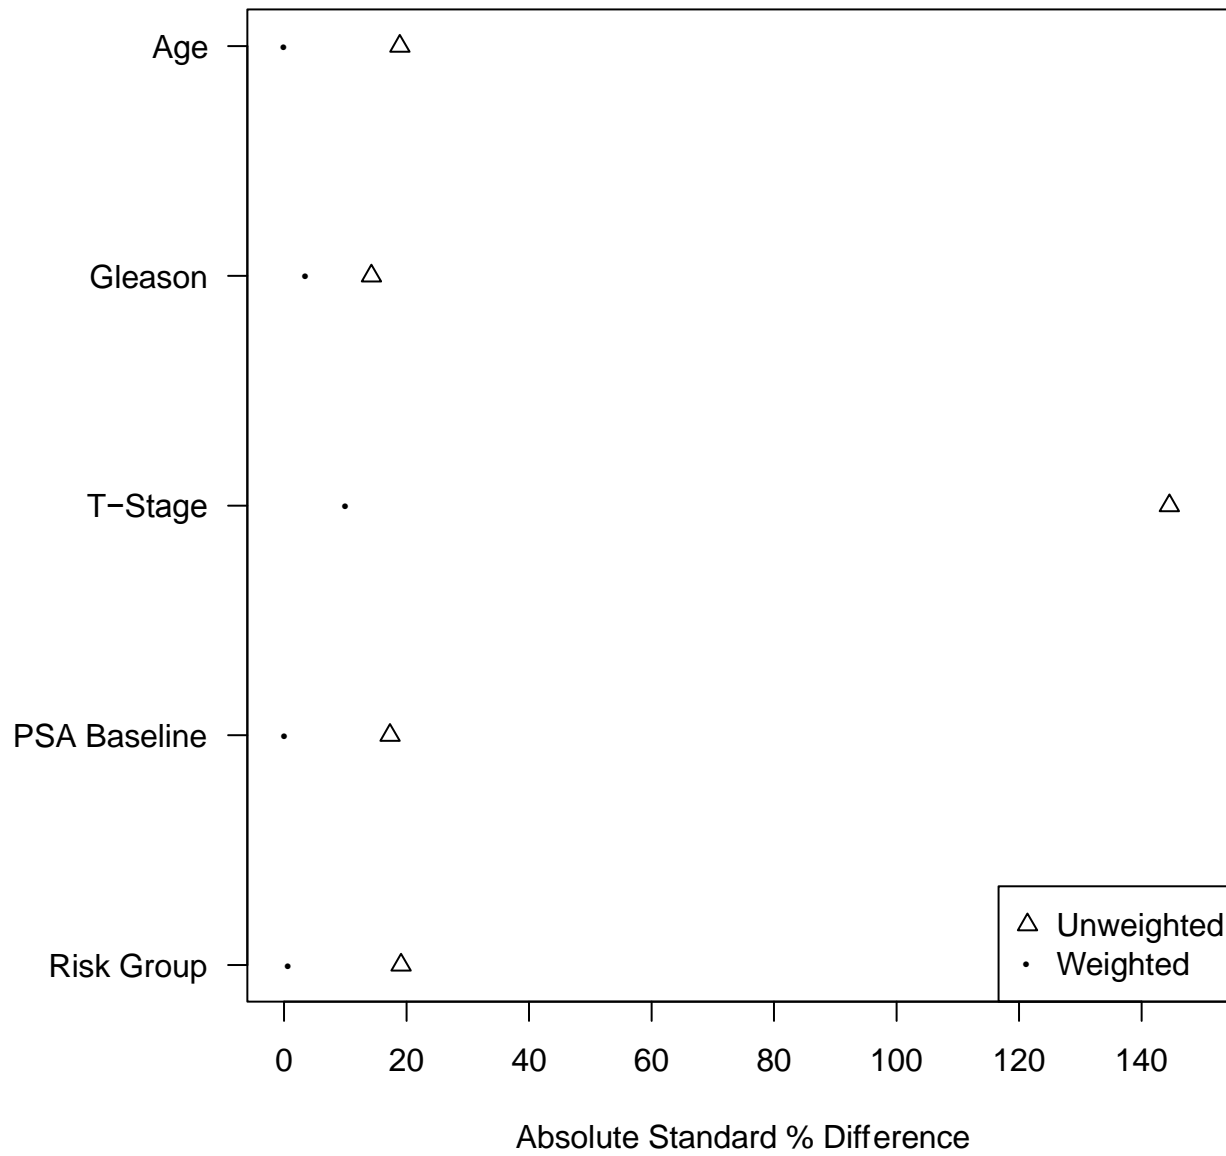

eFigure 1b

**eFigure 1c**

# RCT Race Differences

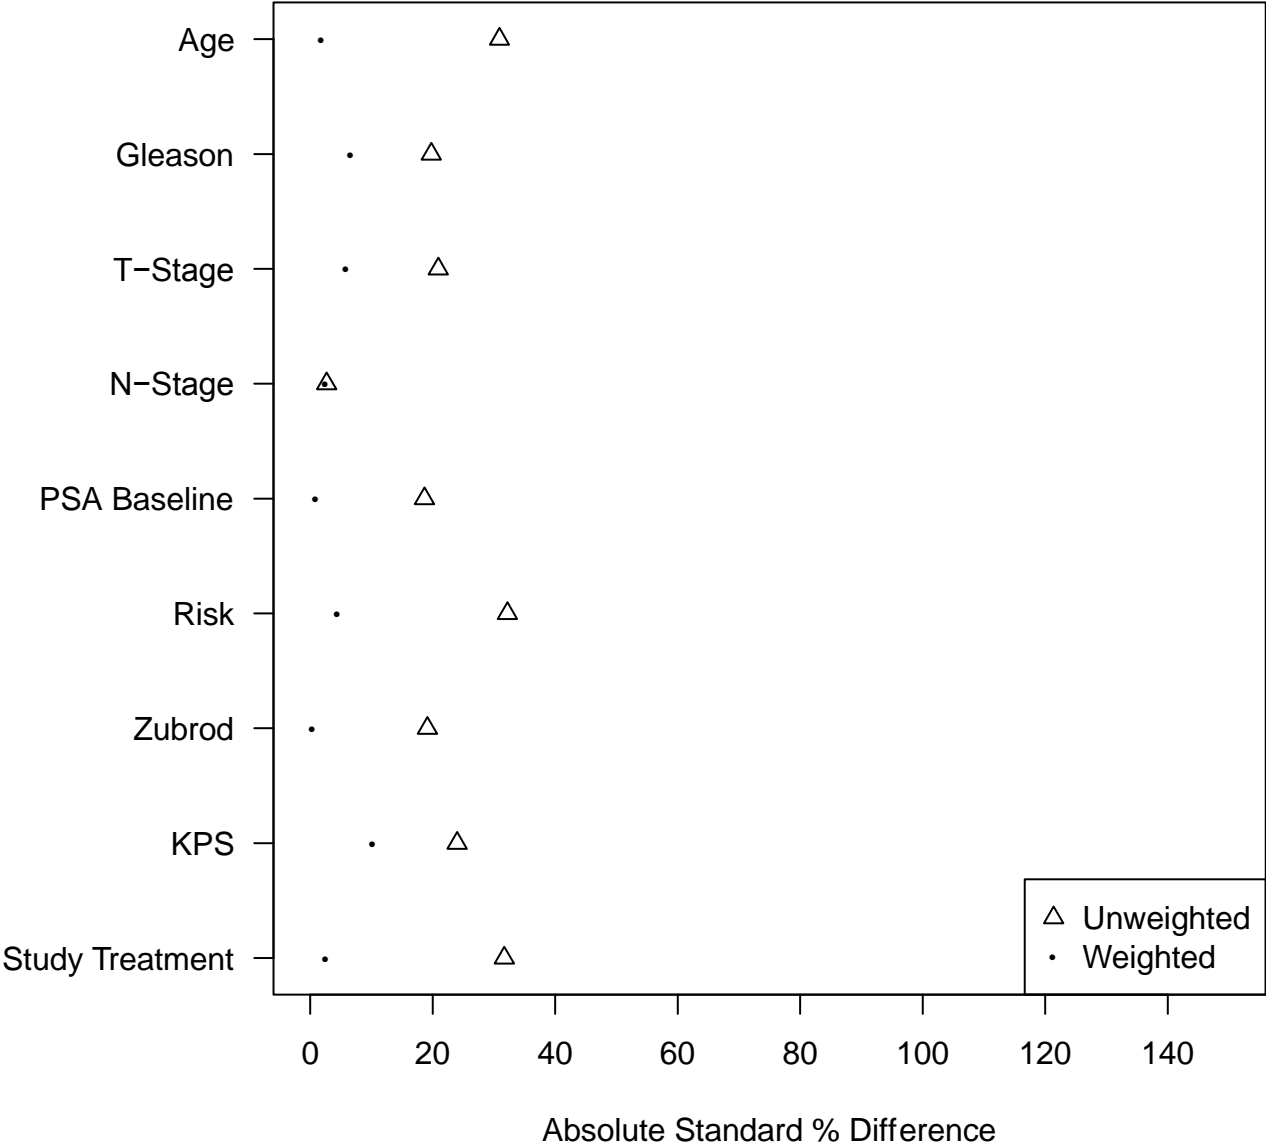

**eFigure 2.** Subgroup Forest Plots of Hazard of Prostate Cancer Specific Mortality for SEER Cohort (A), SEER Cohort With Fine-Gray Competing Risks (B), VA Cohort (C), VA Cohort With Fine-Gray Competing Risks (D), RCT Cohort (E), and RCT Cohort With Fine-Gray Competing Risks (F)

**eFigure 2a:**

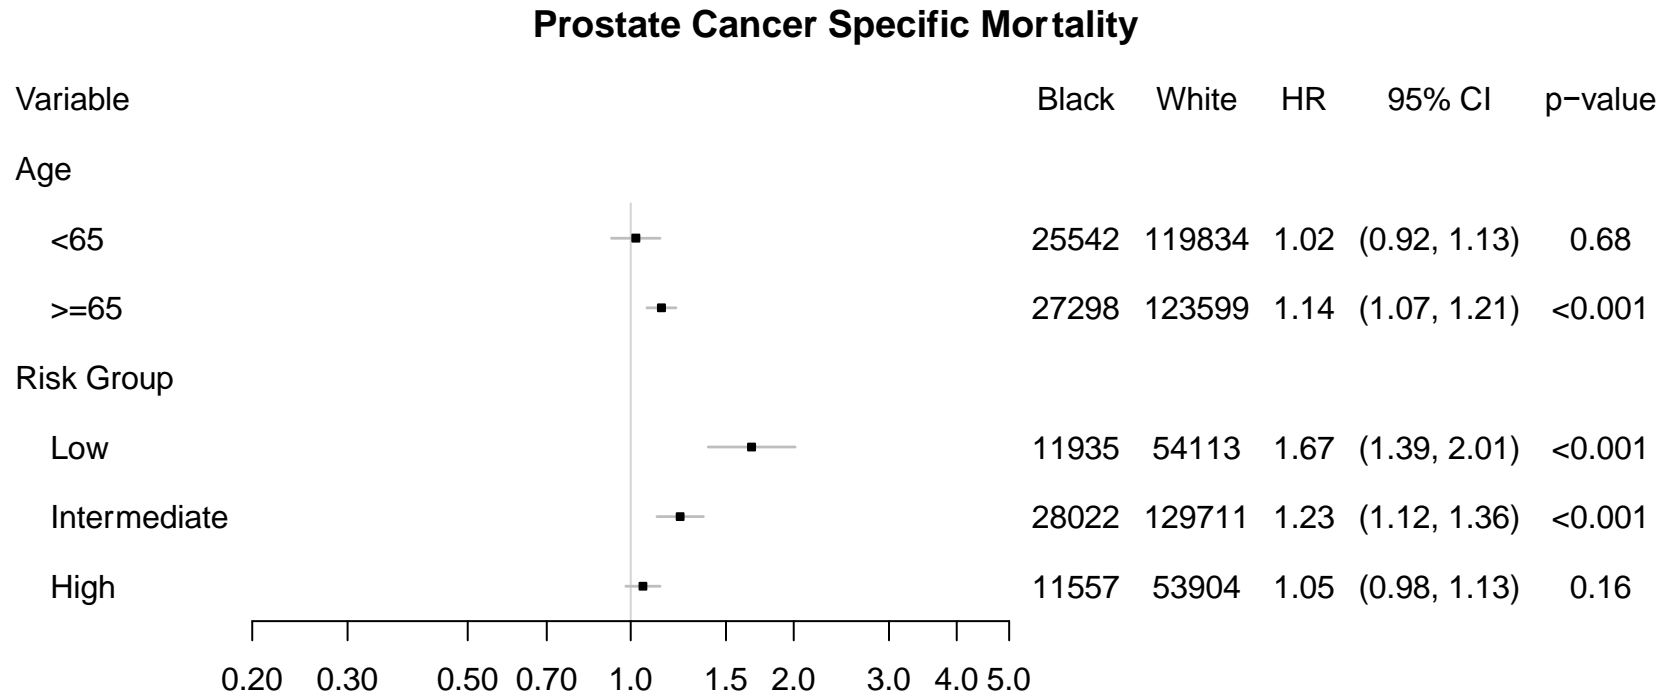



eFigure 2b:

### Prostate Cancer Specific Mortality Fine and Gray Subdistribution Hazard (95% CI)

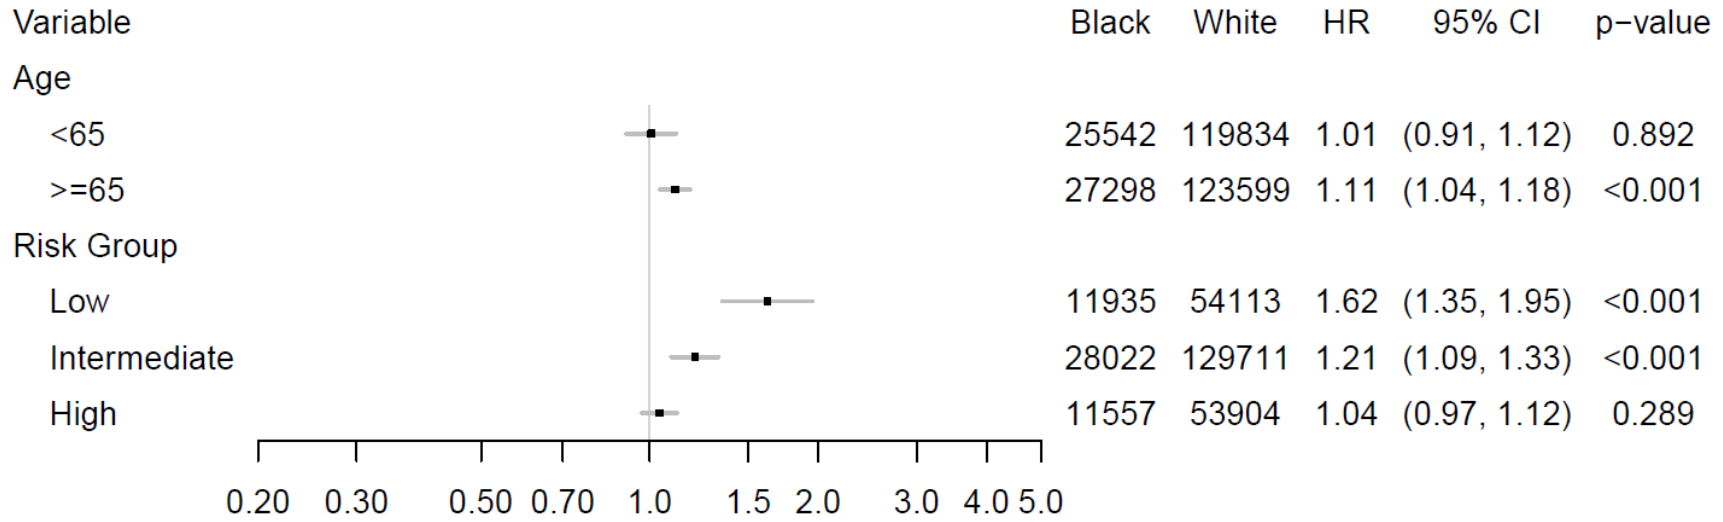

eFigure 2c:

### Prostate Cancer Specific Mortality

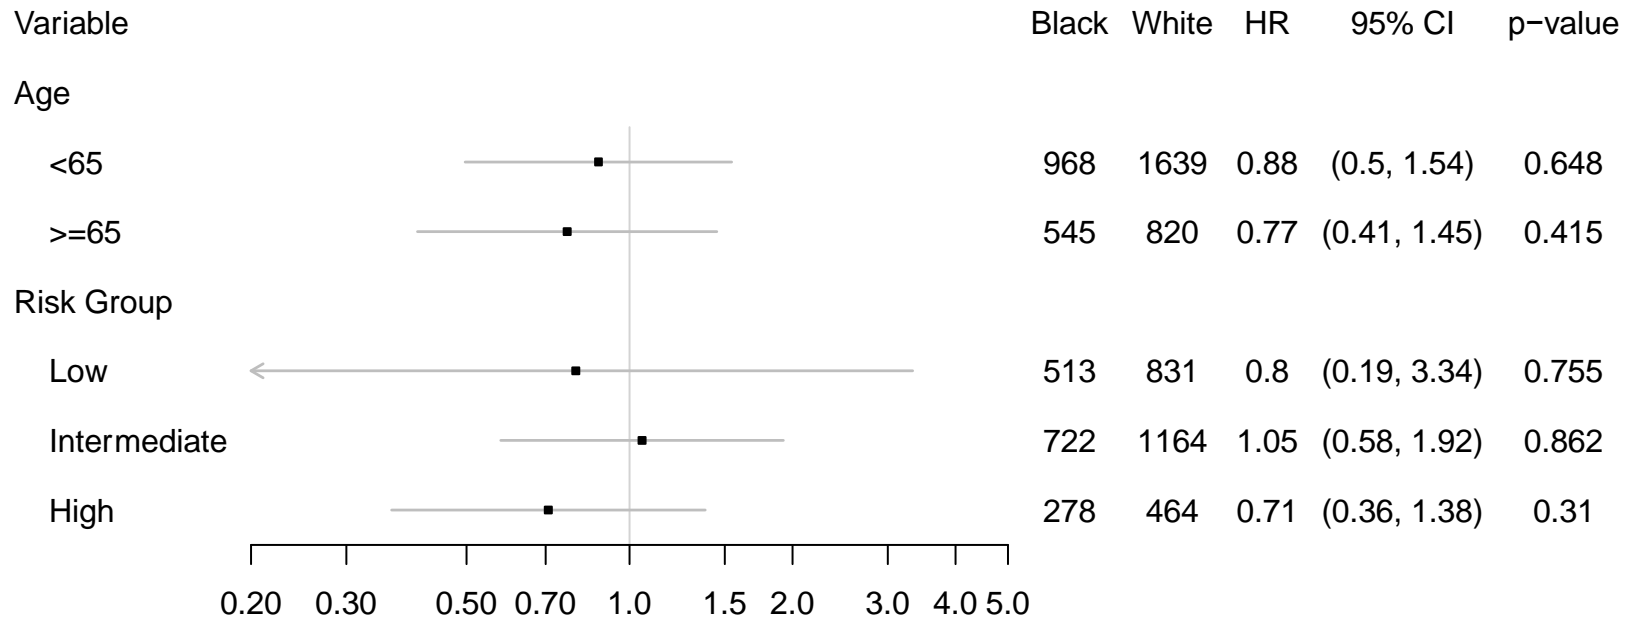

eFigure 2d:

### Prostate Cancer Specific Mortality Fine and Gray Subdistribution Hazard (95% CI)

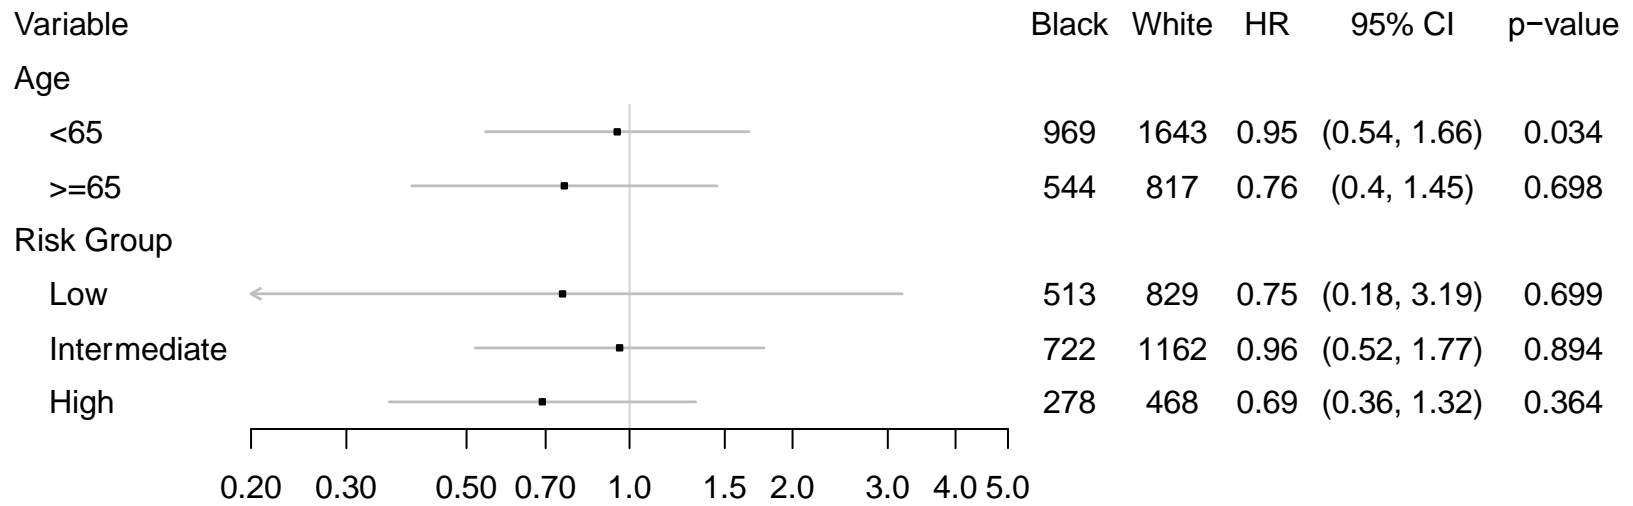

eFigure 2e:

### Prostate Cancer Specific Mortality

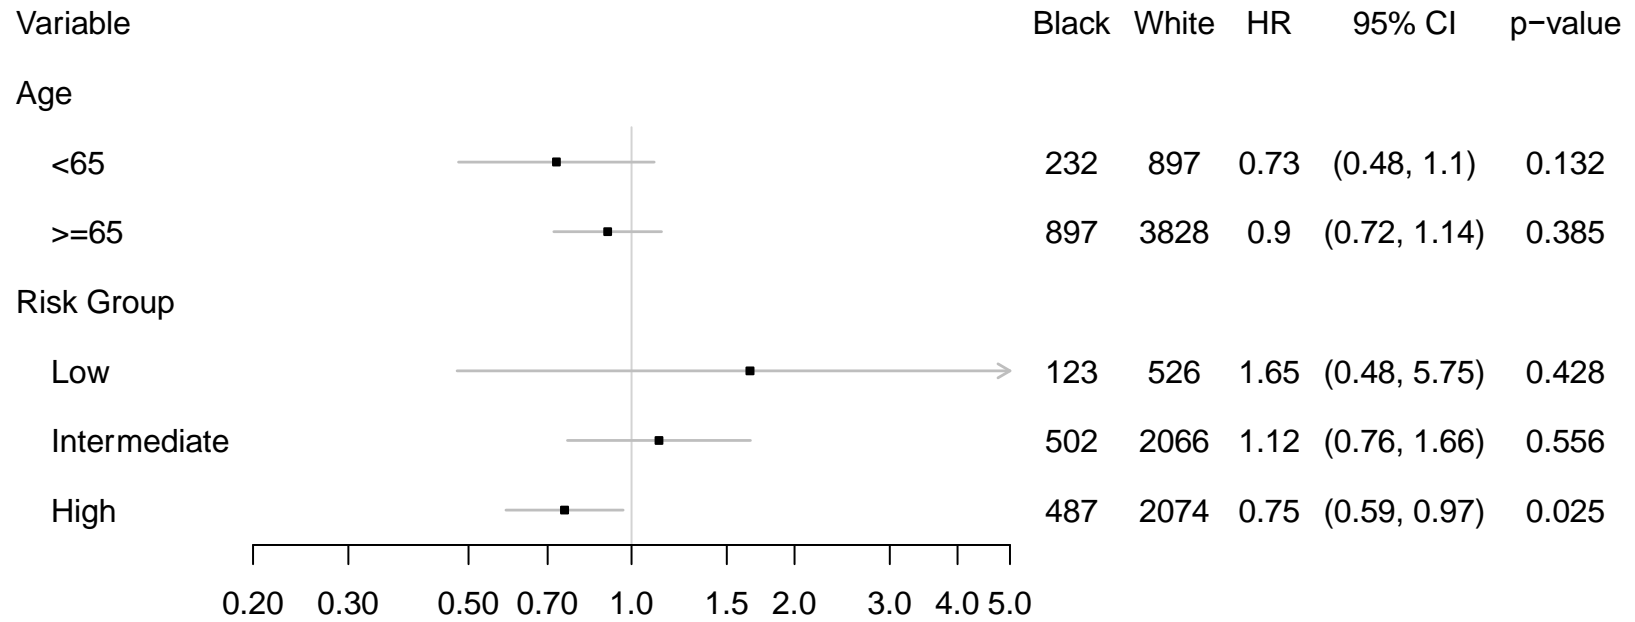

eFigure 2f:

### Prostate Cancer Specific Mortality Fine and Gray Subdistribution Hazard (95% CI)

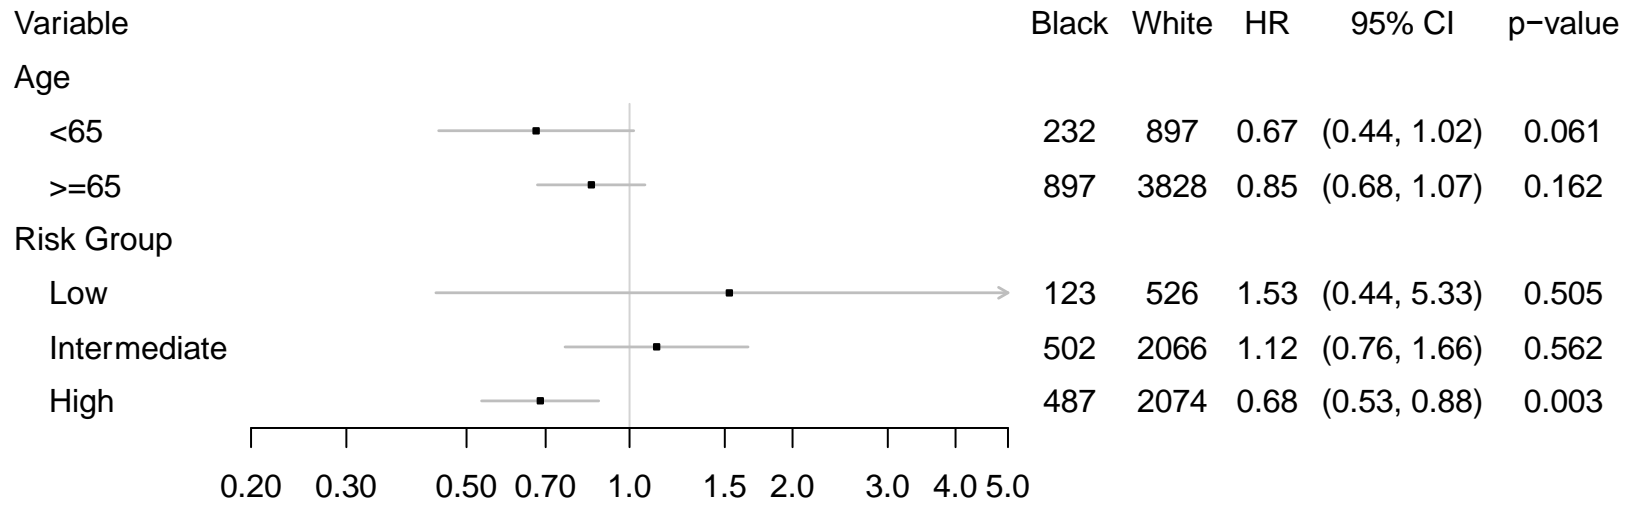

**eFigure 3.** Cumulative Incidence of Prostate Cancer–Specific Mortality and Other-Cause Mortality for the Unadjusted and Unweighted SEER (A), VA (B), and RCT (C) Cohorts  
**eFigure 3a:**

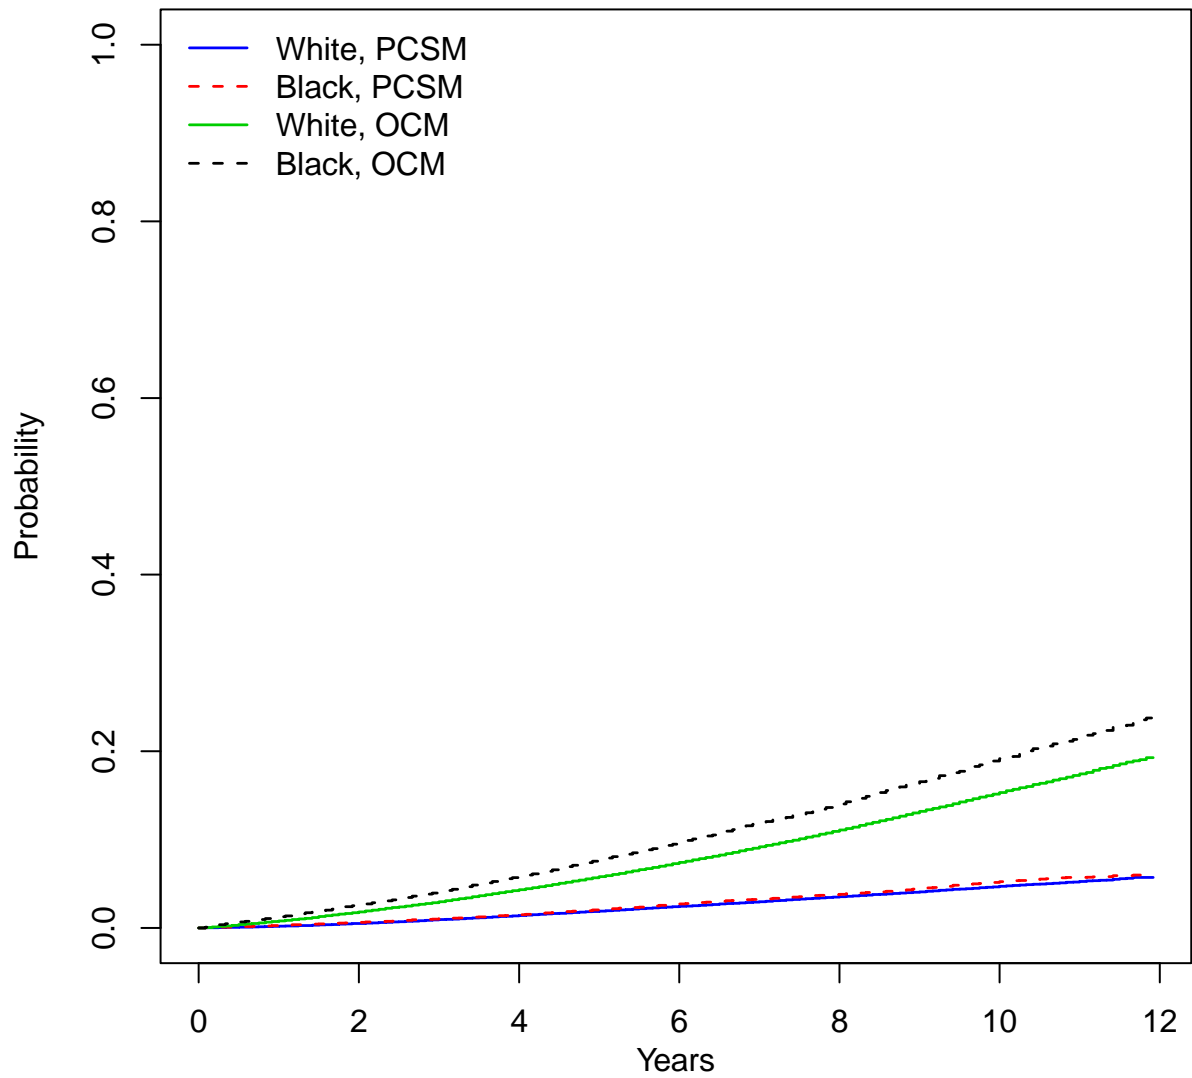

Number at risk

|       |        |        |        |        |       |       |
|-------|--------|--------|--------|--------|-------|-------|
| White | 243433 | 233652 | 184624 | 129009 | 77496 | 31171 |
| Black | 52840  | 49692  | 37657  | 25298  | 14732 | 5817  |

**eFigure 3b:** VA cohort



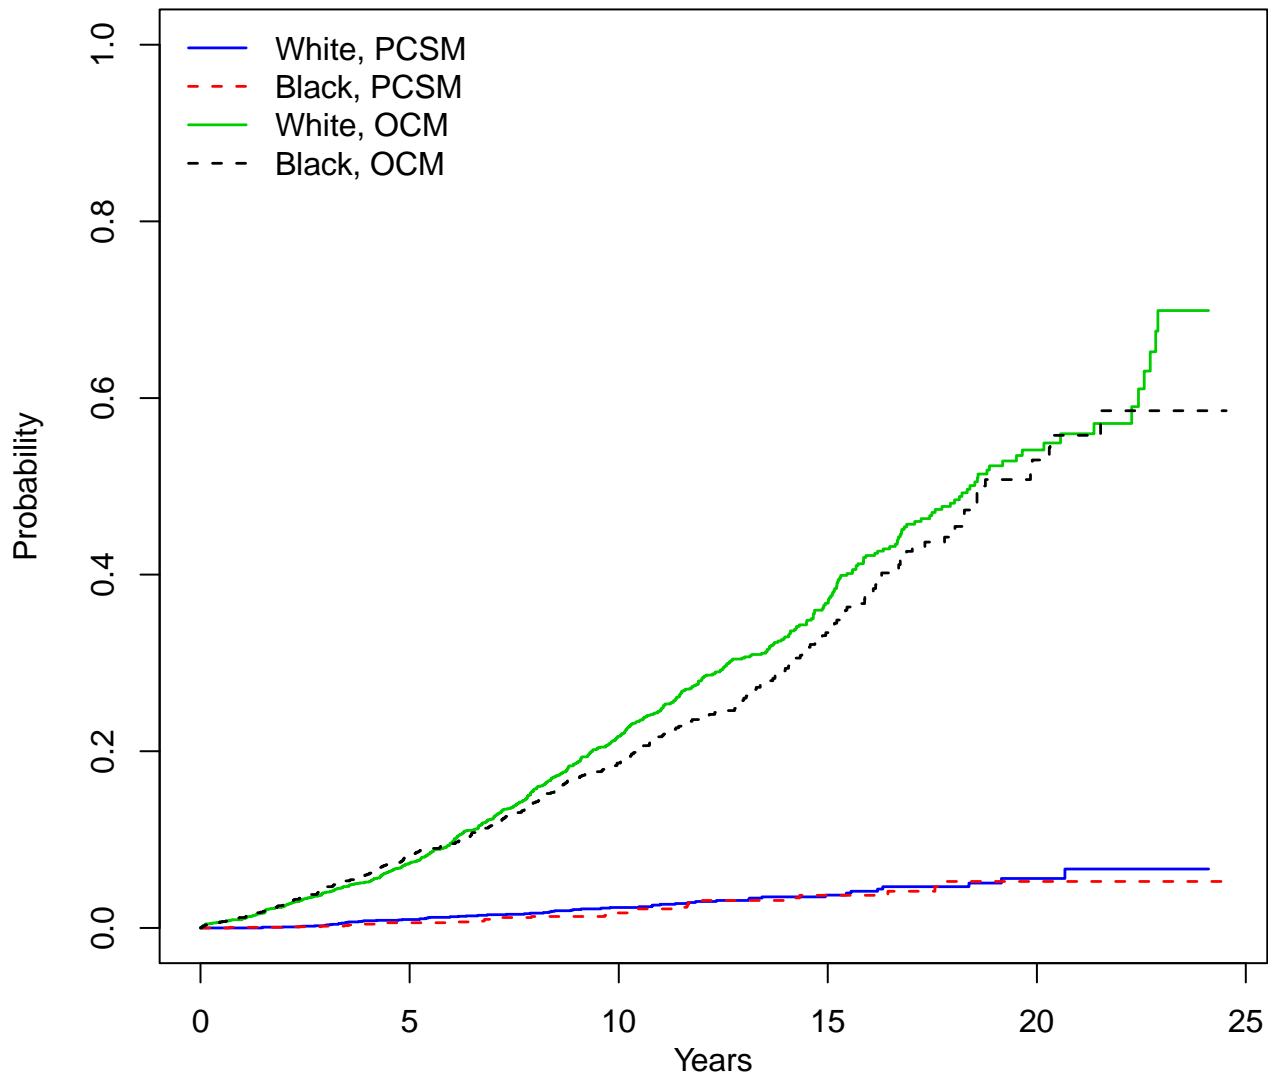

Number at risk

|       |      |      |     |     |    |
|-------|------|------|-----|-----|----|
| White | 2458 | 1858 | 933 | 294 | 52 |
| Black | 1513 | 1080 | 554 | 183 | 35 |

**eFigure 3c:**

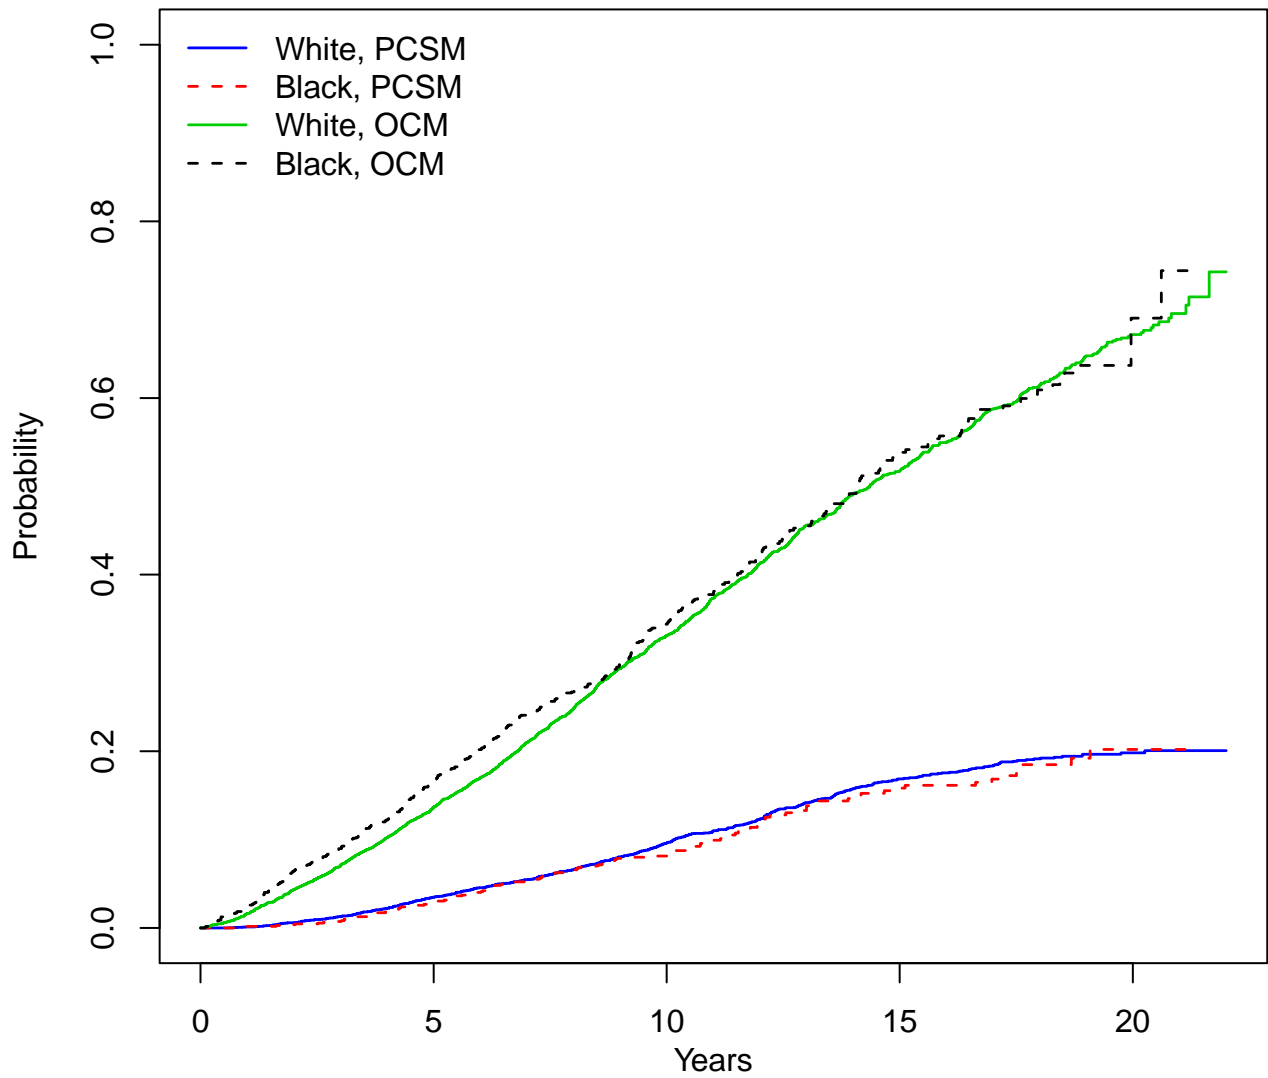

Number at risk

|       |      |      |      |     |    |
|-------|------|------|------|-----|----|
| White | 4724 | 3789 | 1675 | 475 | 65 |
| Black | 1129 | 852  | 384  | 100 | 2  |

**eFigure 4.** Cumulative Incidence of All-Cause Mortality for the Inverse Probability Weighted SEER (A), VA (B), and RCT (C) Cohorts

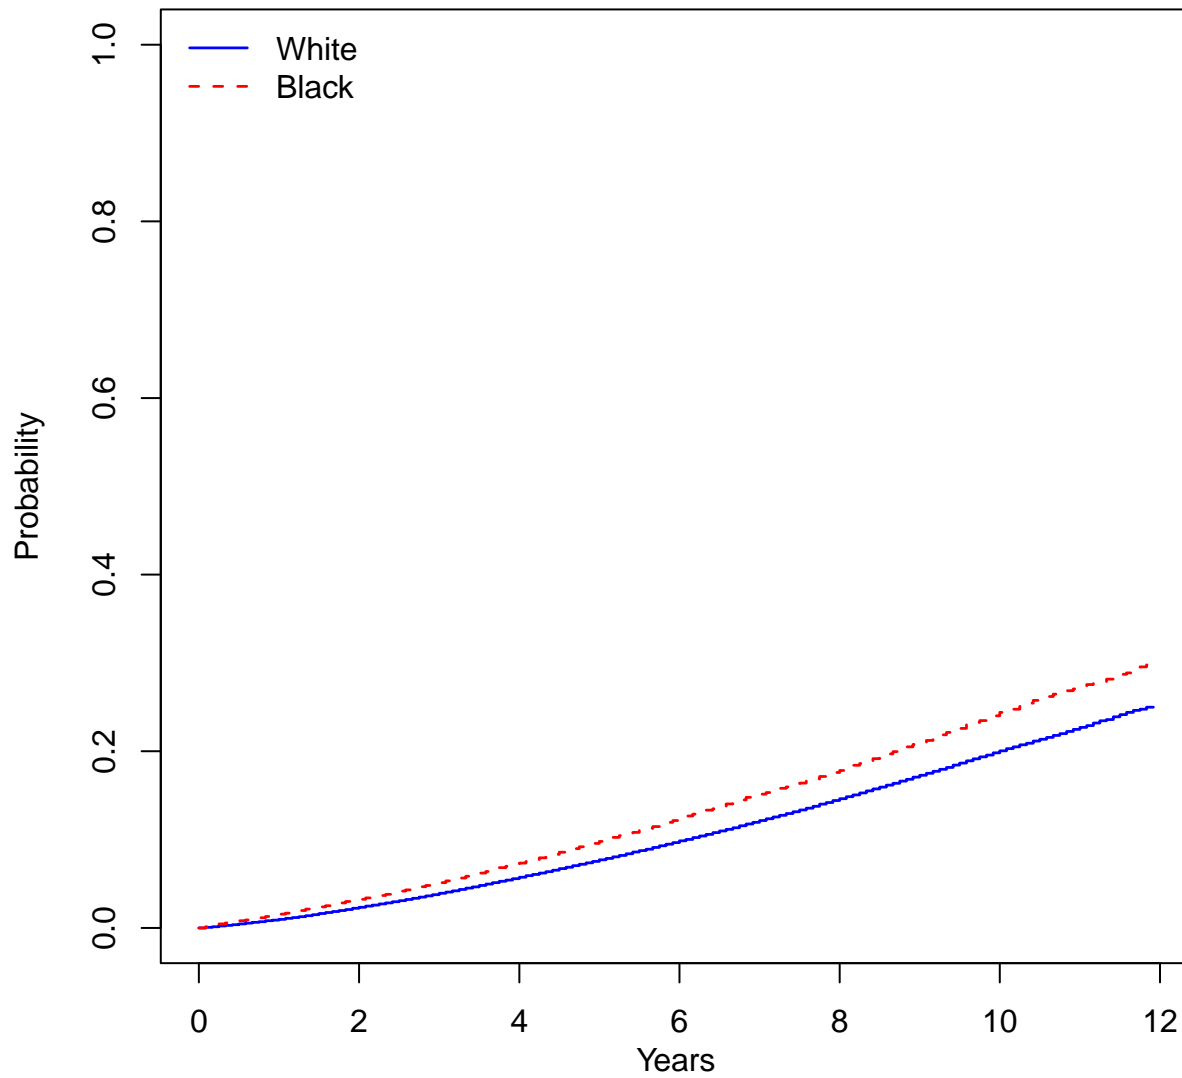

Number at risk

|       |        |        |        |        |       |       |
|-------|--------|--------|--------|--------|-------|-------|
| White | 243433 | 233421 | 183665 | 127983 | 76675 | 30739 |
| Black | 52840  | 49887  | 38549  | 26311  | 15547 | 6310  |

eFigure 4a:

eFigure 4b:

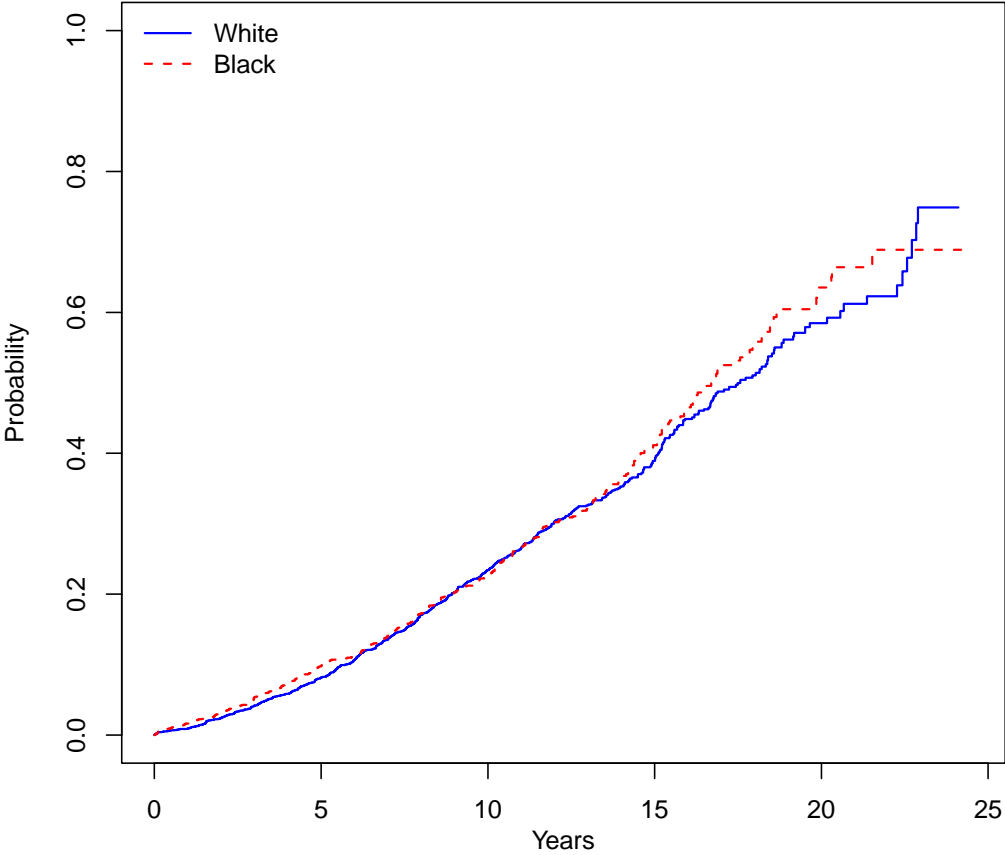

| Number at risk |      |
|----------------|------|
| White          | 2459 |
| Black          | 1513 |
|                | 1863 |
|                | 1074 |
|                | 550  |
|                | 301  |
|                | 186  |
|                | 52   |
|                | 33   |

**eFigure 4c:**

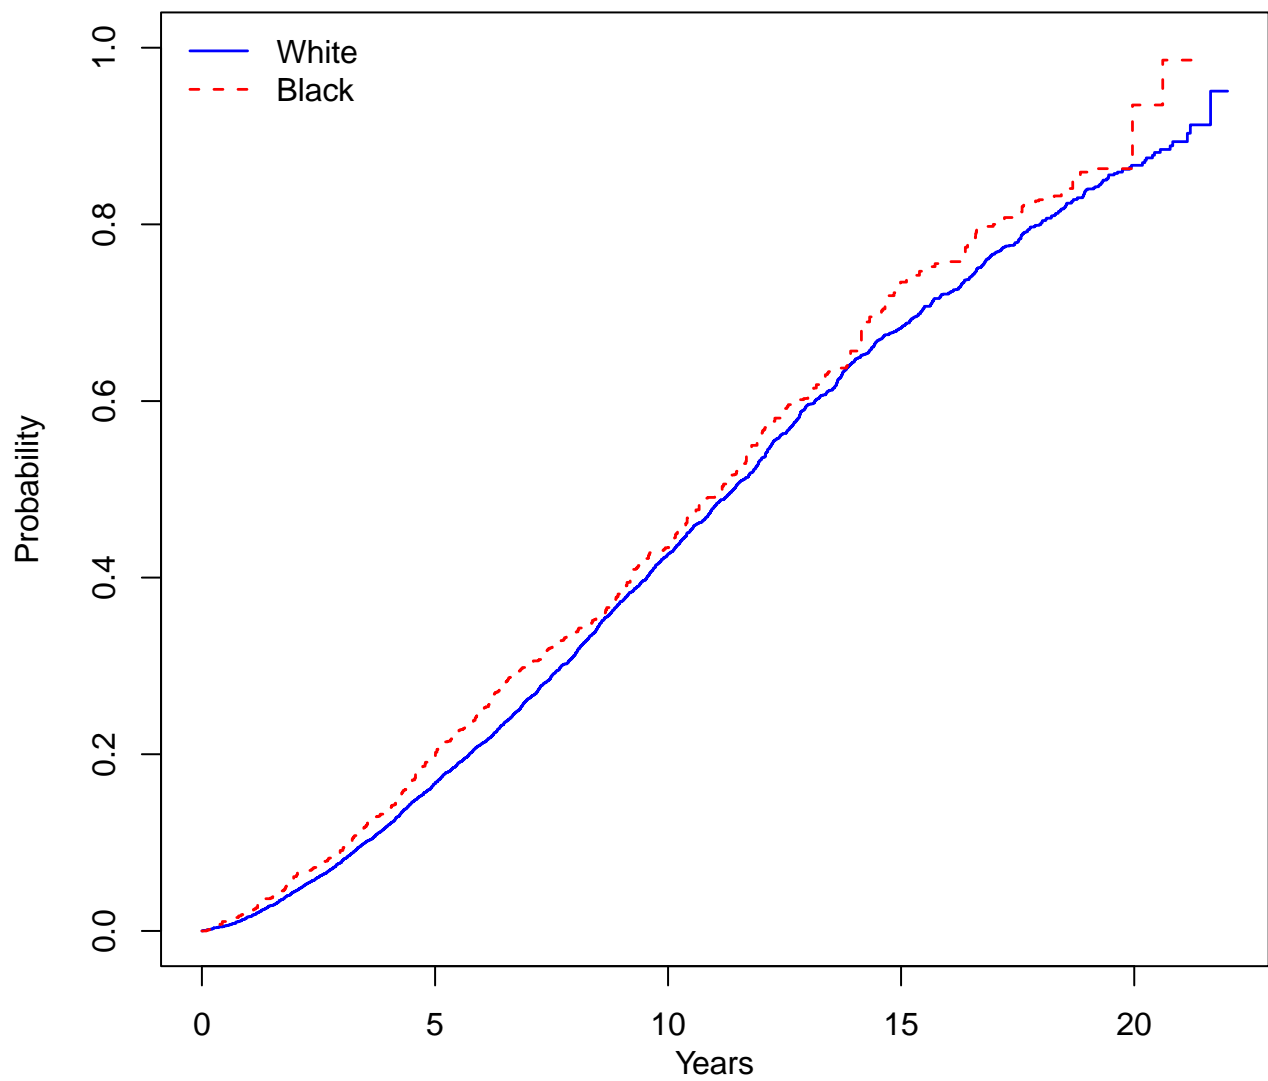

Number at risk

|       |      |      |      |     |    |
|-------|------|------|------|-----|----|
| White | 4724 | 3783 | 1681 | 484 | 63 |
| Black | 1129 | 851  | 383  | 92  | 3  |



**eFigure 5.** Cumulative Incidence of All-Cause Mortality for the Unadjusted SEER (A), VA (B), and RCT (C) Cohorts

**eFigure 5a:**

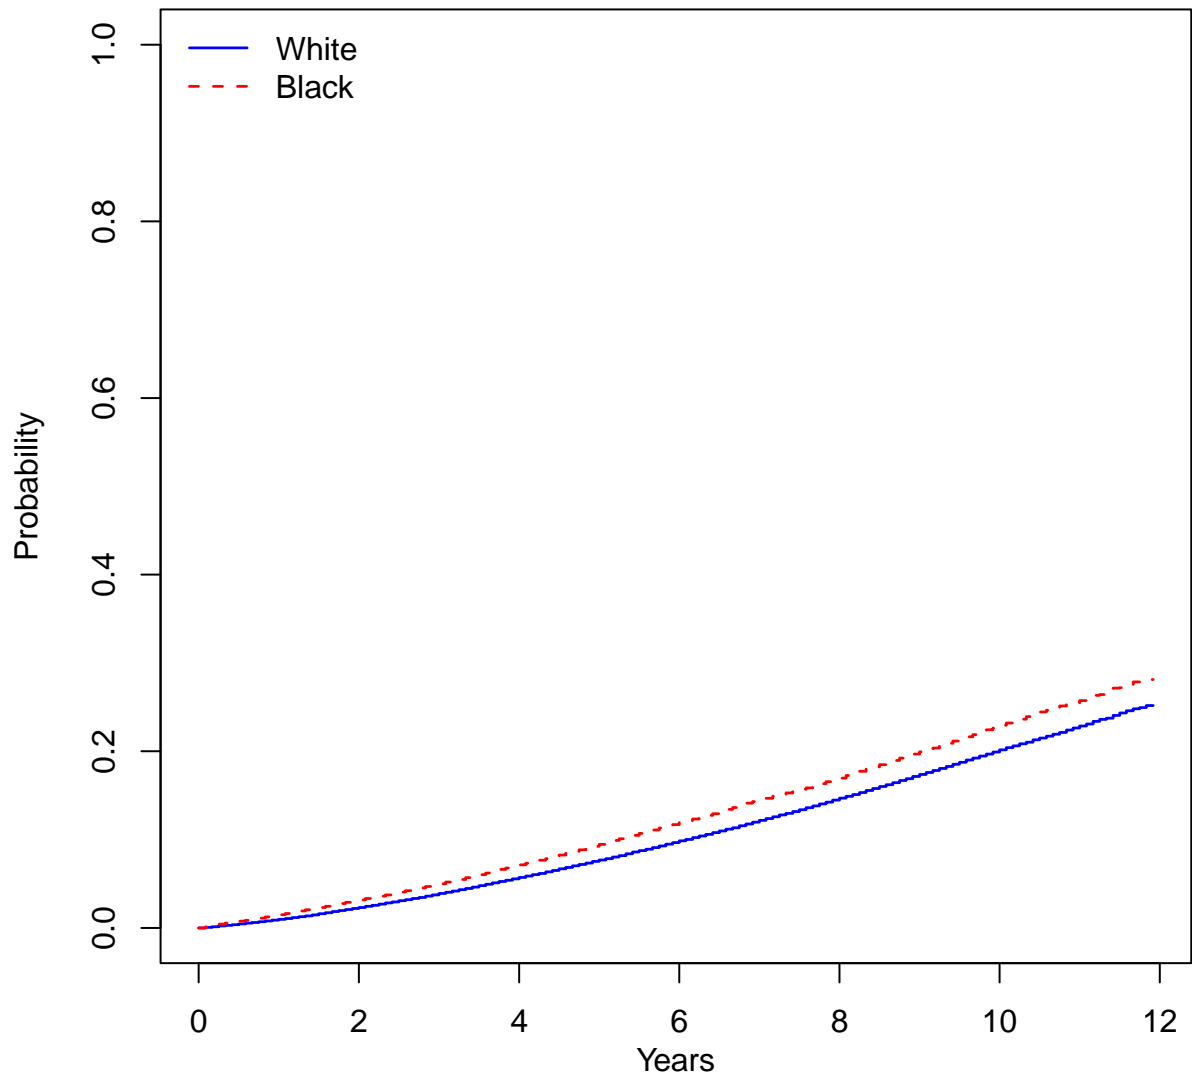

Number at risk

|       |        |        |        |        |       |       |
|-------|--------|--------|--------|--------|-------|-------|
| White | 243433 | 233652 | 184624 | 129009 | 77496 | 31171 |
| Black | 52840  | 49692  | 37657  | 25298  | 14732 | 5817  |

**eFigure 5b:**

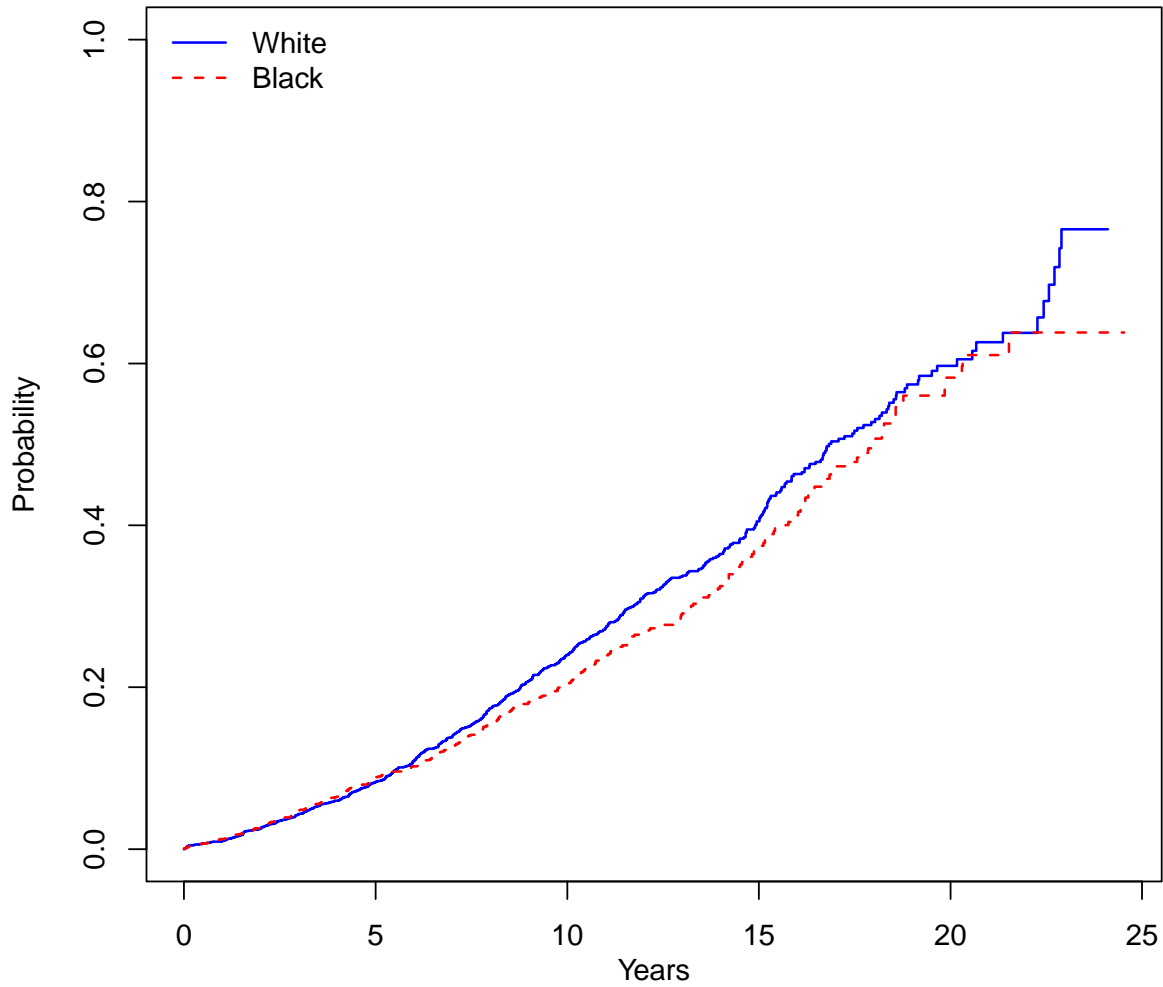

Number at risk

|       |      |      |     |     |    |
|-------|------|------|-----|-----|----|
| White | 2458 | 1858 | 933 | 294 | 52 |
| Black | 1513 | 1080 | 554 | 183 | 35 |

**eFigure 5c:**

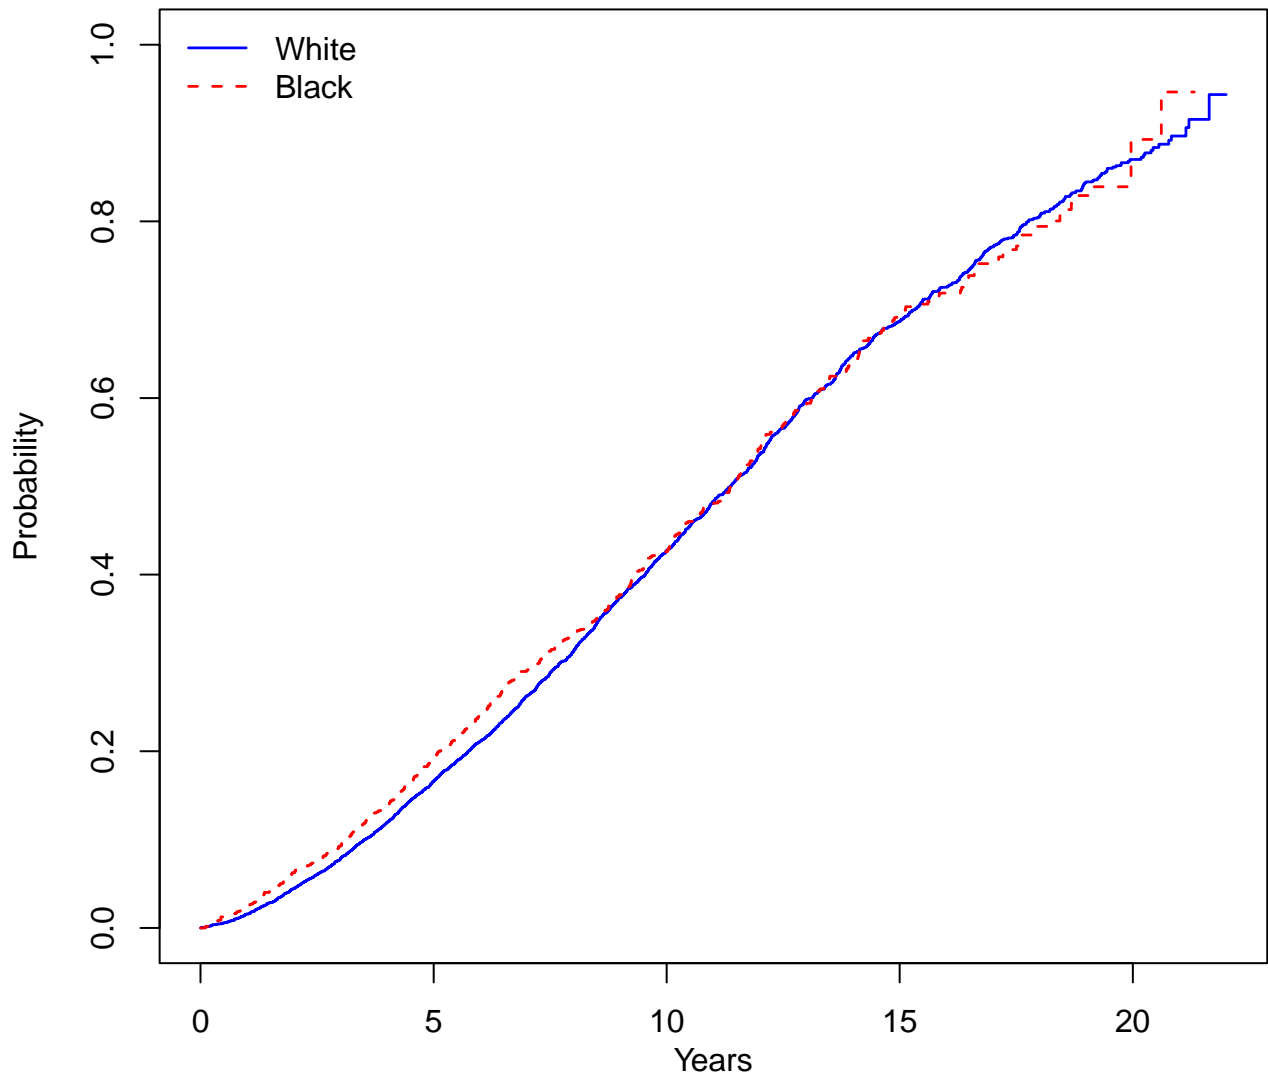

Number at risk

|       |      |      |      |     |    |
|-------|------|------|------|-----|----|
| White | 4724 | 3789 | 1675 | 475 | 65 |
| Black | 1129 | 852  | 384  | 100 | 2  |
